# Supplementary material
Source: HighWire-hosted journal article supplement (https://bmjopen.bmj.com/content/13/7/e070831)
Supplement: inline-supplementary-material-3 [file inline-supplementary-material-3.pdf]

## Appendix – Subspecialty Survey

|                                                                                                                                                                                                                                                            |                                                                                                                                                                                                                 |
|------------------------------------------------------------------------------------------------------------------------------------------------------------------------------------------------------------------------------------------------------------|-----------------------------------------------------------------------------------------------------------------------------------------------------------------------------------------------------------------|
| <b>1. Select your surgical subspecialty:</b>                                                                                                                                                                                                               | a. Breast surgery<br>b. Cardiac surgery<br>c. Colorectal surgery<br>d. Cranial surgery<br>e. General surgery<br>f. Obstetrics & gynecology<br>g. Orthopedic surgery<br>h. Spinal surgery<br>i. Vascular surgery |
| <b>2. Average number of <i>eligible</i> surgeries performed per month within your selected subspecialty at your hospital:</b><br><br><i>Please refer to Appendix – Included Procedures to identify eligible procedures for your selected subspecialty.</i> | a. <10<br>b. 10-29<br>c. 30-49<br>d. 50-69<br>e. >70                                                                                                                                                            |
| <b>3. How many consultants operate patients for your selected subspecialty at your hospital?</b>                                                                                                                                                           | (Number of consultants)                                                                                                                                                                                         |
| <b>4. How many trainees (registrar/ residents/ fellows) operate patients for your selected subspecialty at your hospital?</b>                                                                                                                              | (Number of trainees)                                                                                                                                                                                            |
