# Supplementary material
Source: HighWire-hosted journal article supplement (https://bmjopen.bmj.com/content/13/7/e070831)
Supplement: inline-supplementary-material-8 [file inline-supplementary-material-8.pdf]

## پراجیکٹ کی معلومات

|                                   |                                                                                                                                                    |
|-----------------------------------|----------------------------------------------------------------------------------------------------------------------------------------------------|
| <b>پروجیکٹ نمبر:</b> لاگو نہیں ہے | <b>عنوان:</b> پاکستان میں سرجری (جراحی) کے زخم کے انفیکشن اور اس کے متعلقہ خطرناک عوامل کا تعین – ایک مستقبل سے متعلق، کثیر الادارہ ہمہ گیر مطالعہ |
| <b>کفیل:</b> لاگو نہیں ہے         | <b>ای آر سی حوالہ نمبر:</b> لاگو نہیں ہے                                                                                                           |
| <b>تنظیم:</b> آغا خان یونیورسٹی   | <b>تفتیش کارِ اعلیٰ:</b> ڈاکٹر اطہر اینام                                                                                                          |
| <b>رابطہ نمبر:</b> 02134864741    | <b>مقام:</b> مین کیمپس ، آغا خان یونیورسٹی ، اسٹیڈیم روڈ ، کراچی 74800                                                                             |

میرا نام ڈاکٹر \_\_\_\_\_ ہے اور میرا تعلق آغا خان یونیورسٹی ہسپتال کے شعبہ جراحی (سرجری) سے ہے۔ ہم قومی سطح پر سرجری کے مریضوں کے مابین انفیکشن کی شرح پر ایک تحقیق (ریسرچ) کر رہے ہیں۔ اس طرز کی کلینیکل ریسرچ کے ذریعے اس بابت (اس معاملے کی) تصدیق کی جاتی ہے کہ معیاری صحت عامہ کی ترسیل (فرامی) کو یقینی بنایا جائے اور اس میں مزید بہتری کے وسائل تلاش کیے جائیں۔

ہم لوگ ابھی آپ کو اس تحقیق کی تفصیلات سے آگاہ کریں گے اور آپ کو اس میں شمولیت کی دعوت دیں گے۔ آپ کا اس تحقیق میں حصہ لینے کا فیصلہ جلد بازی کا نہیں ہونا چاہیے۔ اس میں چند اصطلاحات شاید تھوڑی مبہم ہوں اور عین ممکن ہے کہ آپ کو سمجھ نہ آئیں۔ ایسی صورتحال میں آپ فوراً مجھے ٹوک کر ان کے معنی پوچھنے کے حقدار ہیں۔ میں ان کے معنی تفصیل میں سمجھانے کا مجاز ہونگا۔

## عنوان:

پاکستان میں سرجری (جراحی) کے زخم کے انفیکشن اور اس کے متعلقہ خطرناک عوامل کا تعین – ایک مستقبل سے متعلق، کثیر الادارہ ہمہ گیر مطالعہ

## مقاصدِ تحقیق:

سرجری کے بعد زخم کی جگہ پر انفیکشن ، سرجری کی پیچیدگیوں میں سب سے زیادہ عام ہے۔ اس ریسرچ کا مقصد پاکستان کے مریضوں میں سرجری کے بعد زخم کے انفیکشن کی شرح جانچنا اور اس سے ملحقہ خطرناک عوامل کی نشاندہی کرنا ہے۔ اس تحقیق کے نتائج مریضوں میں سرجری کے بعد انفیکشن کم کرنے اور بہتر حکمت عملی اختیار کرنے میں معاون ثابت ہونگے۔

## کارروائی/ حکمتِ عملی:

ہم آپ کے ہسپتال کے ریکارڈ سے اس تحقیق سے متعلق مخصوص معلومات اکٹھی کریں گے۔ آپ کی سرجری کے بعد، ہم 30 دنوں کے اندر آپ کے سرجیکل زخم کا جائزہ لیں گے تاکہ یہ معلوم ہو سکے کہ آیا آپ کو سرجیکل سائٹ میں انفیکشن ہوا ہے یا نہیں۔ یہ فالو اپ آپ کی سرجری کے 3، 15 اور 30 دنوں کے بعد ٹیلی فونک انٹرویوز کے ذریعے کیے جا سکتے ہیں۔ اس دوران آپ کی تمام تر ذاتی تفصیلات اور شناخت در پردہ رکھی جائیں گی۔

## ممکنہ خطرات:

اس ریسرچ میں حصہ لینے سے آپ کو کوئی جانی یا مالی نقصان ہونے کا کوئی خطرہ نہیں ہے۔

## ممکنہ فوائد:

اس ریسرچ میں حصہ لینے سے آپ کو کوئی ذاتی یا مالی فائدہ نہیں ہوگا۔ ہاں البتہ، اس ریسرچ کے حاصل ہونے والے نتائج کو مدنظر رکھتے ہوئے اس طرح قانون سازی کی جائے گی کہ وہ مستقبل کے مریضوں کی بہتر دیکھ بھال میں ہماری معاون و مددگار ثابت ہوگی۔

## مالی خیالات/ فوائد:

اس تحقیق میں آپ کی شرکت کے لیے کوئی مالی معاوضہ نہیں ہے۔

## حقوقِ رازداری:

اس مطالعے میں آپ کی شناخت کو خفیہ رکھا جائے گا۔ مطالعہ کے نتائج سائنسی مقاصد کے لئے شائع ہو سکتے ہیں لیکن آپ کے نام اور آپ کی ذاتی تفصیلات کو در پردہ رکھا جائے گا۔

## حقوقِ ترکِ شمولیت:

آپ کو اس تحقیقی مطالعے میں حصہ لینے یا نہ لینے کی مکمل آزادی ہے۔ اگر آپ اس میں حصہ لینے کے خواہشمند نہیں ہیں تو اس فیصلے کا آپ علاج معالجے پر کوئی اثر نہیں ہوگا۔ آپ کو اس مطالعے کے دوران تیار کردہ کسی بھی اہم نئی تلاش کی فراہمی کی جائے گی جو آپ کی شرکت جاری رکھنے پر آپ کی رضا مندی سے متعلق یا اس پر اثر انداز ہو سکتی ہے۔ یہ دستاویز دستخط

کرنے کے بعد بھی اگر آپ اس تحقیقی مطالعے سے دستبردار ہونا چاہتے ہیں تو براہ کرم ڈاکٹر اطہر اینام کو مطلع کر دیں۔

رابطہ نمبر: 02134864741

ای میل / برقی ڈاک: ather.enam@aku.edu

### معلومات کے دستیاب ذرائع:

اس تحقیقی مطالعے کے مطلق آپ کے تمام تر سوالات کے جوابات کے لیے ذیلی ہسپتال کے مندرجہ ذیل افراد سے رابطہ کیجیے۔

تفتیش کار اعلیٰ: ڈاکٹر اطہر اینام

رابطہ نمبر: 02134864741

اس تحقیقی مطالعے میں شمولیت کے حقوق کی مزید تفصیلات کے لیے براہ کرم مندرجہ ذیل شخص سے رابطہ کریں۔

نام: ڈاکٹر اطہر اینام

رابطہ نمبر: 02134864741

مطالعے سے متعلق ہنگامی صورتحال میں مندرجہ ذیل نمبرز پر رابطہ کریں۔

دن کے لیے: 02134864741

رات کے لیے: 03217534630

### تصنیف:

میں تصدیق کرتا ہوں کہ میں نے اس دستاویز کو مکمل طور پر پڑھا اور سمجھا ہے اور یہ کہ میں اس تحقیقی مطالعے کا حصہ بننے کا خواہشمند/پر رضامند ہوں۔ مجھے علم ہے کہ مجھے اس دستاویز کی ایک نقل فراہم کی جائے گی۔ میں بغیر کسی دباؤ کے رضاکارانہ طور پر اس مطالعے میں حصہ لے رہا ہوں۔ میں یہ بھی جانتا ہوں کہ اس مطالعے میں شامل کسی بھی فرد کی غفلت یا دیگر قانونی بھول چوک کی صورت میں میری رضامندی سے کوئی قانونی حقوق ثبت نہیں کیے جائیں گے۔ مجھے اس بات کا بھی علم ہے کہ یہ دستاویز پر میرے دستخط میرے کسی وفاقی، ریاستی یا مقامی حقوق کو تلف نہیں کریں گے۔

شرکت کرنے والے کا نام:

شرکت کرنے والے کے دستخط:

بتاریخ:

گواہ کا نام:

گواہ کے دستخط:

بتاریخ:

تفتیش کار اعلیٰ کے دستخط:

بتاریخ:

رضامندی حاصل کرنے والے کا نام:

رضامندی حاصل کرنے والے کے دستخط:

بتاریخ:
